# Supplementary material for: Improved hydrothermal stability of silica materials prepared from ethyl silicate 40
Source: Royal Society of Chemistry journal article supplement (doi:10.1039/c4ra12483a), 2014-12-16
Supplement: c4ra12483a1.pdf [file c4ra12483a1.pdf]

## Improved hydrothermal stability of molecular sieving silica materials prepared from ethyl silicate 40

Shengnan Wang<sup>a</sup>, David K. Wang<sup>a\*</sup>, Kevin S. Jack<sup>b</sup>, Simon Smart<sup>a</sup>, João C. Diniz da Costa<sup>a</sup>

### Supplementary Information

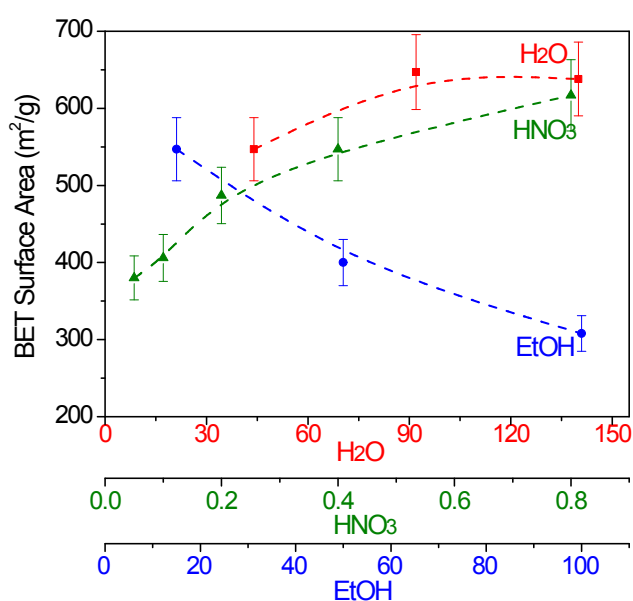

**Fig. S1** BET surface area of silica xerogels prepared from different ratio of H<sub>2</sub>O (red), HNO<sub>3</sub> (green) and EtOH (blue) to Si, respectively.

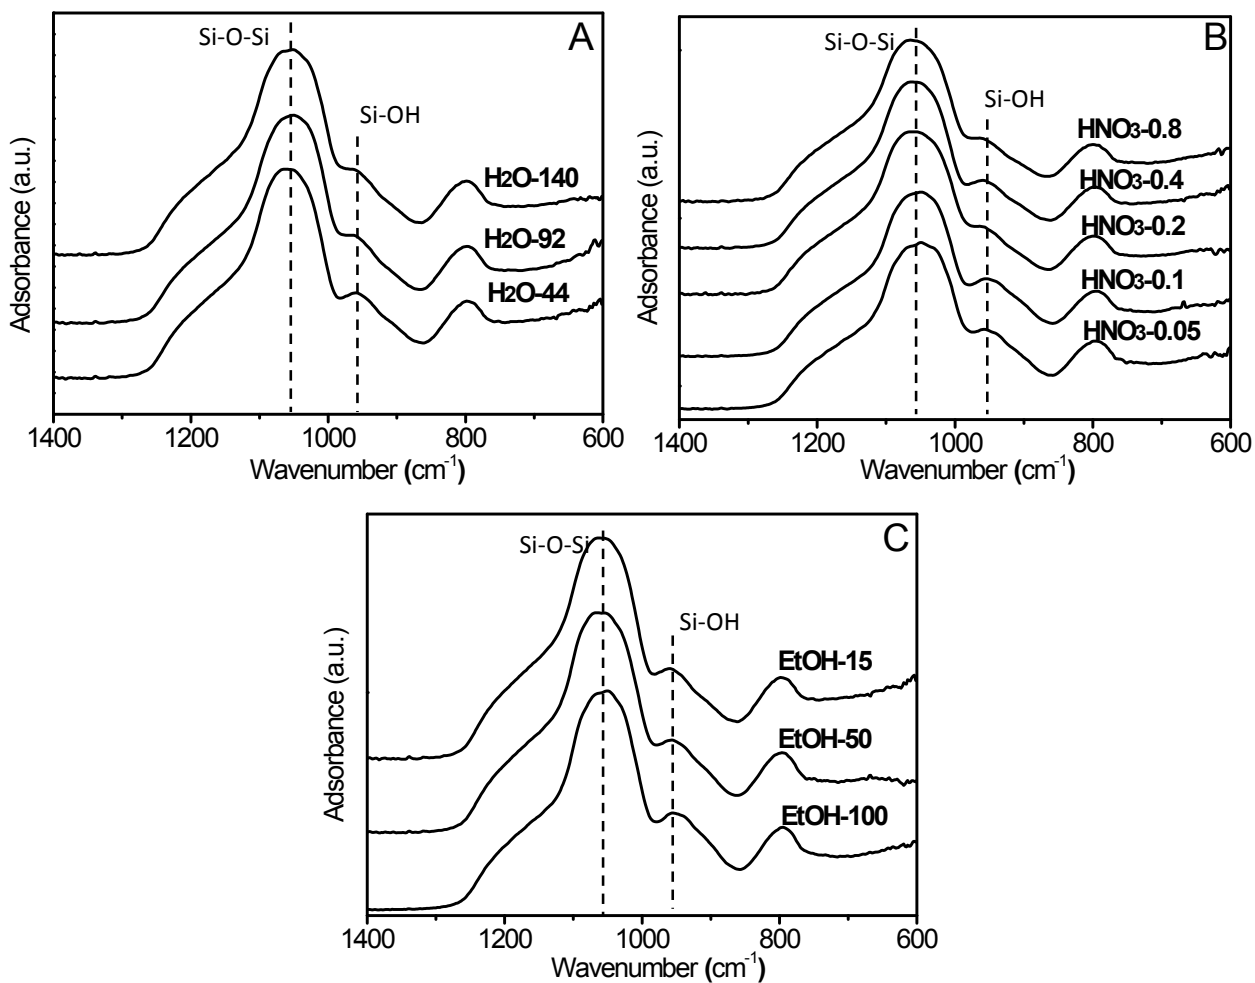

**Fig. S2** FTIR spectra of the silica xerogels prepared from different ratio of H<sub>2</sub>O (A), HNO<sub>3</sub> (B) and EtOH (C) to ES40, respectively.

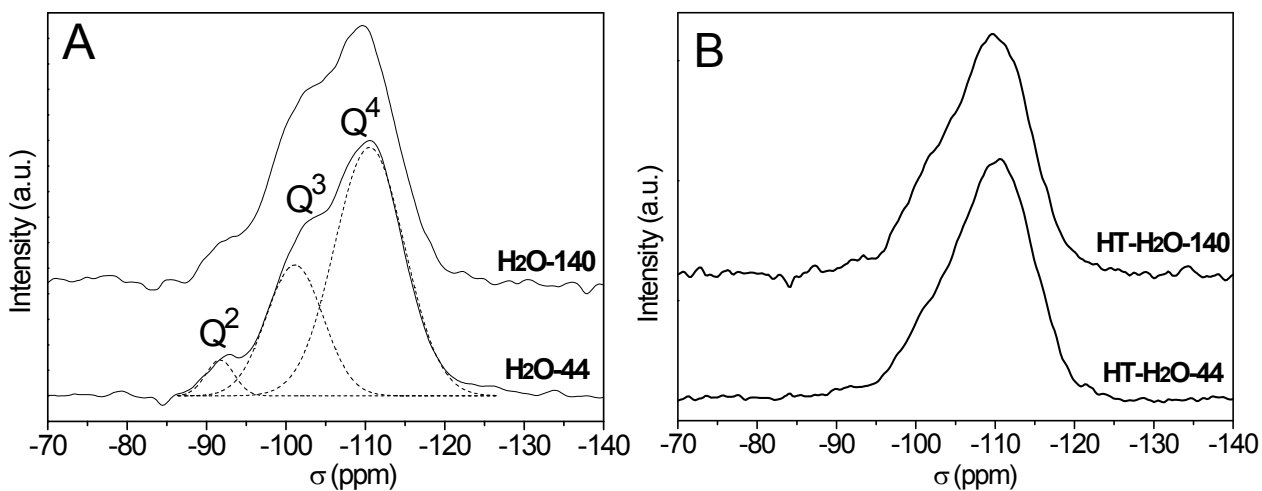

**Fig. S3** <sup>29</sup>Si NMR Spectra of H<sub>2</sub>O-44 and H<sub>2</sub>O-140 silica xerogels before (A) and after hydrothermal test (B).
